# Supplementary material
Source: PubMed Central journal article supplement (PMC3048681)
Supplement: supp_M110.156430_jbc.M110.156430-1.pdf [file supp_M110.156430_jbc.M110.156430-1.pdf]

## SUPPLEMENTAL FIGURE LEGENDS

**Figure S1. (A)** ER stress sensors, IRE1 $\alpha$ , sXBP1 and p-PERK are not different in various brain regions of ATF6 $\alpha$  KO mice under physiological conditions *in vivo*. The tissue lysates of 3 month-aged ATF6 $\alpha$  KO mice and ATF6 $\alpha$  WT littermate were subjected to western blot analysis for detection of IRE1 $\alpha$ , sXBP1, p-PERK and  $\beta$ -actin (n= 5). Each protein level was quantified using optical density and estimated relative to  $\beta$ -actin protein level. Abbreviation: CTX, cerebral cortex; BS, brainstem; HIP, hippocampus; STR, striatum; MB, midbrain; CR, cerebellum; OB, olfactory bulb; T, thalamus; SC, spinal cord; 3M, 3 months aged group. Asterisk indicates statistical significance (\*p<0.05, \*\*p<0.01). Each bar denotes the mean  $\pm$  S.D. **(B)** Comparative analysis of levels of protein involved in synaptic secretion and vesicular transport between ATF6 $\alpha$  WT (+/+) and KO (-/-) mice. Protein levels of VMAT2, Rab1A and Syntaxin were significantly increased in ATF6 $\alpha$  KO mice as compared with those of WT mice. Protein levels in the striatum of 12 month-aged ATF6 $\alpha$  WT and KO mice were measured by quantitative immunoblotting using image-J densitometry and the values relative to  $\beta$ -actin were compared with those of WT mice. (Each group, n=7-10) Abbreviation: VMAT2, Vesicular Monoamine Transporter 2. **(C-E)** ATF6 $\alpha$  is not essential for the development and the survival of dopaminergic neurons. 12 month-old male ATF6 $\alpha$  KO (-/-) mice and ATF6 $\alpha$  WT (+/+) littermates were used for comparative analysis. Each bar denotes the mean  $\pm$  S.D. **(C)** Representative TH staining of coronal midbrain sections of ATF6 $\alpha$  KO and ATF6 $\alpha$  WT mice. Scale bar indicates 50 $\mu$ m. **(D)** The number of TH-positive neurons in the SNc of ATF6 $\alpha$  KO and ATF6 $\alpha$  WT mice (n= 5 for each group). **(E)** Immunoblot analysis of the striatum tissue lysates of ATF6 $\alpha$  KO and ATF6 $\alpha$  WT mice for detection of TH and DAT (n= 9-10). Each protein level was quantified using optical density. Abbreviation: TH, Tyrosine hydroxylase; DAT, dopamine transporter.

**Figure S2. (A)** Hydrogen peroxide (H<sub>2</sub>O<sub>2</sub>)–induced oxidative stress induced phosphorylation of p38MAPK and cleavage of pATF6 $\alpha$  (P) to produce pATF6 $\alpha$ (N). Immunoblot of cell lysates from ATF6 $\alpha$  WT (+/+) and ATF6 $\alpha$  KO (-/-) mice embryonic fibroblasts (MEFs) treated with 50  $\mu$ M H<sub>2</sub>O<sub>2</sub> for 60, 120, 240 mins using antibodies against ATF6 $\alpha$ , p38MAPK, phosphorylated p38MAPK (p-p38MAPK) and  $\beta$ -actin. 5  $\mu$ M SB203585 was added into the medium prior to H<sub>2</sub>O<sub>2</sub> treatment as indicated. **(B)** There was no aggregate stained with 1% Thioflavin T (dye for amyloid) and no accumulated material immunostained with anti- $\alpha$ -synuclein antibody or anti-phosphorylated  $\alpha$ -synuclein (P- $\alpha$ -synuclein) antibody. **(C)** Representative images of primary co-cultured dopaminergic neurons derived from the midbrain and the striatum of the embryonic day 15 ATF6 $\alpha$  WT/KO mice. Primary cultured cells were immunostained with DAPI, anti-Tuj1 (neuronal marker) antibody and anti-TH antibody. Scale bars indicate 100 $\mu$ m. Abbreviation: BF, bright-field image; TH, Tyrosine hydroxylase.

**Figure S3. (A-C)** MPP<sup>+</sup> induces release of N-terminal ATF6 $\alpha$  fragment with subsequent translocation into the nucleus and colocalization with phosphorylated p38MAPK. SH-SY5Y cells were transfected with p38MAPK and pGFP-ATF6 $\alpha$  (P) for 24 hours and then immunostained with anti-p38MAPK antibody (**A, red**) and DAPI (**A, blue**). After transfection SH-SY5Y cells were treated with 1mM MPP<sup>+</sup> for 24 hours, fixed and stained with anti-p38MAPK antibody (**B, red**) or anti-phosphorylated p38MAPK (p-p38MAPK) antibody (**C, red**) and DAPI (blue). Scale bars indicate 10  $\mu$ m. **(D-G)** Hydrogen peroxide (H<sub>2</sub>O<sub>2</sub>) induces release of N-terminal ATF6 $\alpha$  fragment with subsequent translocation into the nucleus and colocalization with phosphorylated p38MAPK. HEK293T cells were transfected with p38MAPK and pGFP-ATF6 $\alpha$  (P) for 24 hours and then immunostained with anti-p38MAPK antibody (**D, red**) or anti-p-p38MAPK antibody (**E, red**). After transfection HEK293T cells were treated with 50  $\mu$ M H<sub>2</sub>O<sub>2</sub> for 60 mins, fixed and stained with anti-p38MAPK antibody (**F, red**) or anti-p-p38MAPK antibody (**G, red**). Scale bars indicate 10  $\mu$ m. **(H)** H<sub>2</sub>O<sub>2</sub> treatment

enhances the binding of N-terminal fragment of ATF6 $\alpha$  with p-p38MAPK. HEK293T cells were transfected with 2  $\mu$ g flag-p38MAPK vector and 2  $\mu$ g N-terminal fragment of ATF6 $\alpha$  (1-373) vector; they were then cultured with or without 50  $\mu$ M H<sub>2</sub>O<sub>2</sub> in the presence or absence of 5  $\mu$ M SB203585 for 60 mins. Each lysates were immunoprecipitated with anti-flag antibody (**Upper panel**) or anti-p-p38MAPK antibody (**Middle panel**) and immunoblotted with an anti-ATF6 $\alpha$  antibody. Western blot analysis of 10 % input lysates were performed with anti-ATF6 $\alpha$ , p-p38MAPK, p38MAPK and  $\beta$ -actin antibodies (**Lower panels**). Abbreviation: IP, immunoprecipitation; IB, immunoblotting; SB, SB203585; N-ATF6 $\alpha$ , N-terminal fragment of ATF6 $\alpha$  (1-373). (**I and J**) p38MAPK phosphorylation enhances the transcriptional activity of ATF6 $\alpha$ . (**I**) Vectors(1  $\mu$ g ERSE reporter carrying BiP promoter-Luciferase vector, 100ng pRL-SV40 vector and 1  $\mu$ g control vector or p38MAPK vector) were mixed with 1  $\mu$ g Mock(pcDNA-3.1(+)) or N-terminal fragment (1-373)(N-ATF6 $\alpha$ ) or dominant-negative form (171-373)(ATF6 $\alpha$ -DN) of ATF6 $\alpha$  vector for transfection of HEK293T cells in a 6-well dish for 48 h. HEK293T cells were challenged with or without 50  $\mu$ M H<sub>2</sub>O<sub>2</sub> for 1 h and lysed for analysis of BiP reporter expression. Each bar denotes the mean  $\pm$  S.D. (**J**) Vectors (1  $\mu$ g 5 $\times$ UPRE reporter vector, 100ng pRL-SV40 vector and 1  $\mu$ g control vector or p38MAPK vector) were mixed with 1  $\mu$ g Mock (pcDNA-3.1(+)) or N-ATF6 $\alpha$  or ATF6 $\alpha$ -DN vector for transfection of HEK293T cells in a 6-well dish for 48 h. 293T cells were challenged with or without 50  $\mu$ M H<sub>2</sub>O<sub>2</sub> for 1 h and lysed for analysis of UPRE reporter expression.

# Supplemental Figure 1

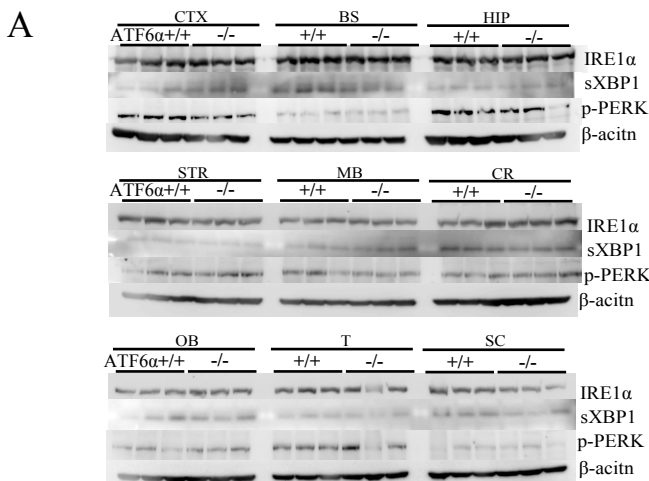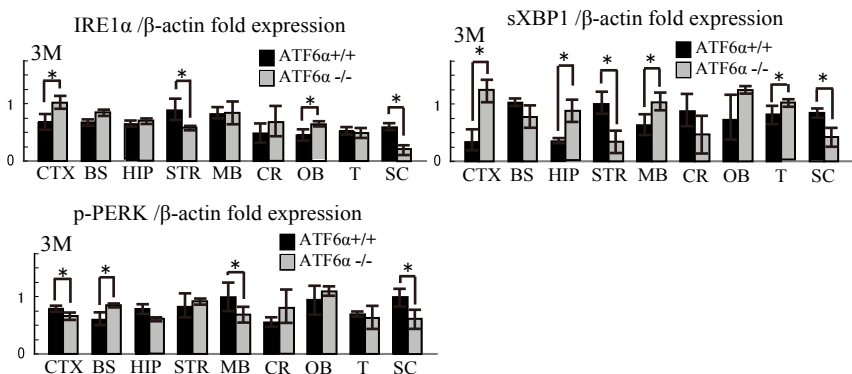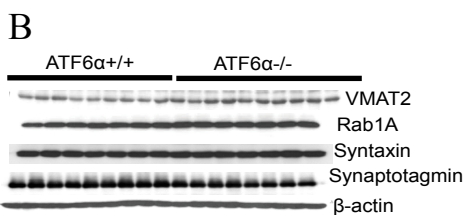

| Striatal Protein | WT(%) | ATF6α KO(%±S.D.) |
|------------------|-------|------------------|
| VMAT2            | 100   | 139.75 ± 17.95*  |
| Rab1A            | 100   | 128.29 ± 7.71*   |
| Syntaxin         | 100   | 120.23 ± 16.10*  |
| Synapsin I       | 100   | 113.44 ± 10.75   |
| Synaptophysin    | 100   | 105.93 ± 7.34    |
| Rab8             | 100   | 102.87 ± 4.52    |
| p115             | 100   | 102.09 ± 7.07    |
| Rab3             | 100   | 101.12 ± 13.59   |
| Synaptotagmin    | 100   | 84.41 ± 6.59*    |

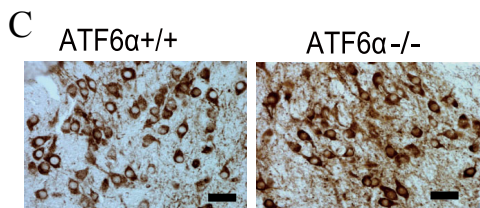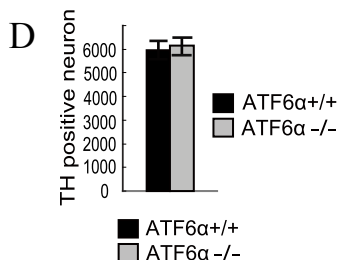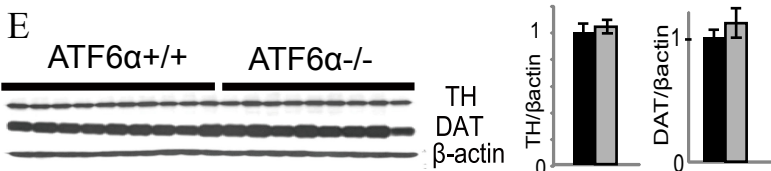

# Supplemental Figure 2

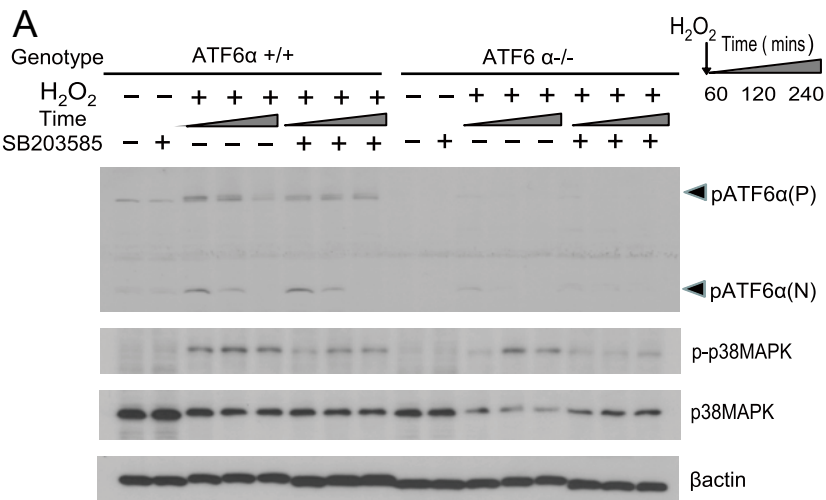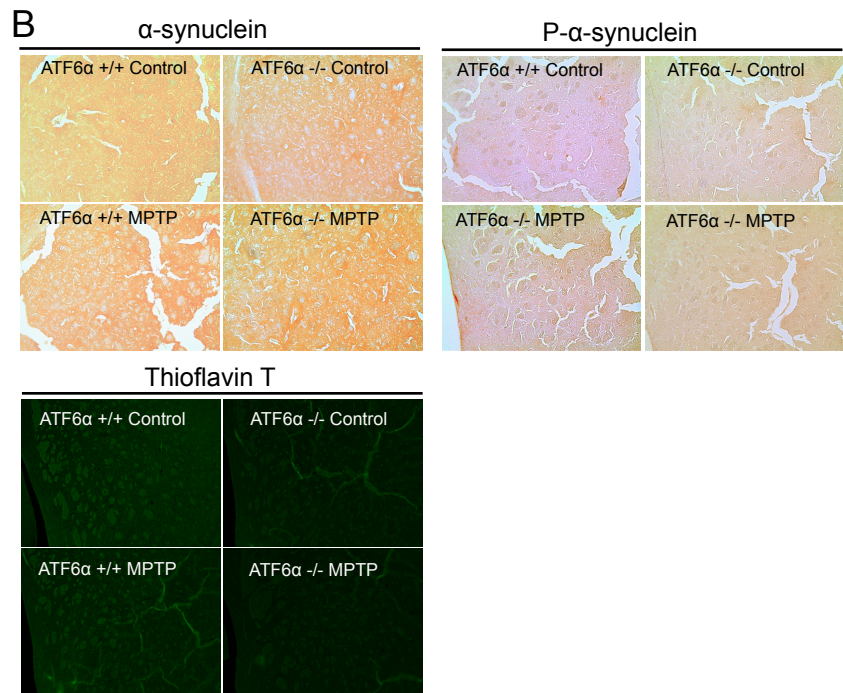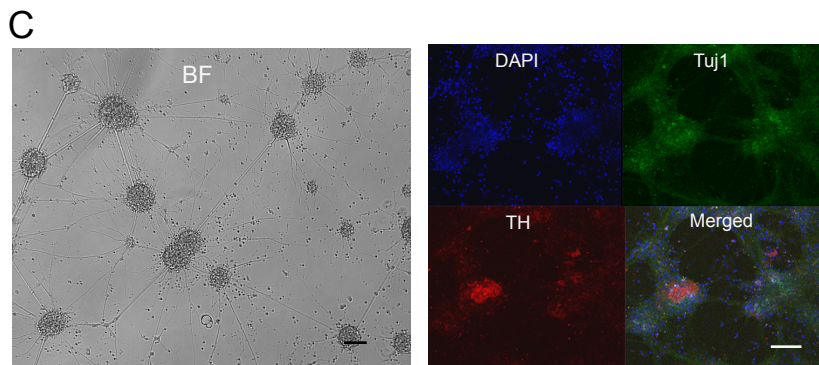

# Supplemental Figure 3

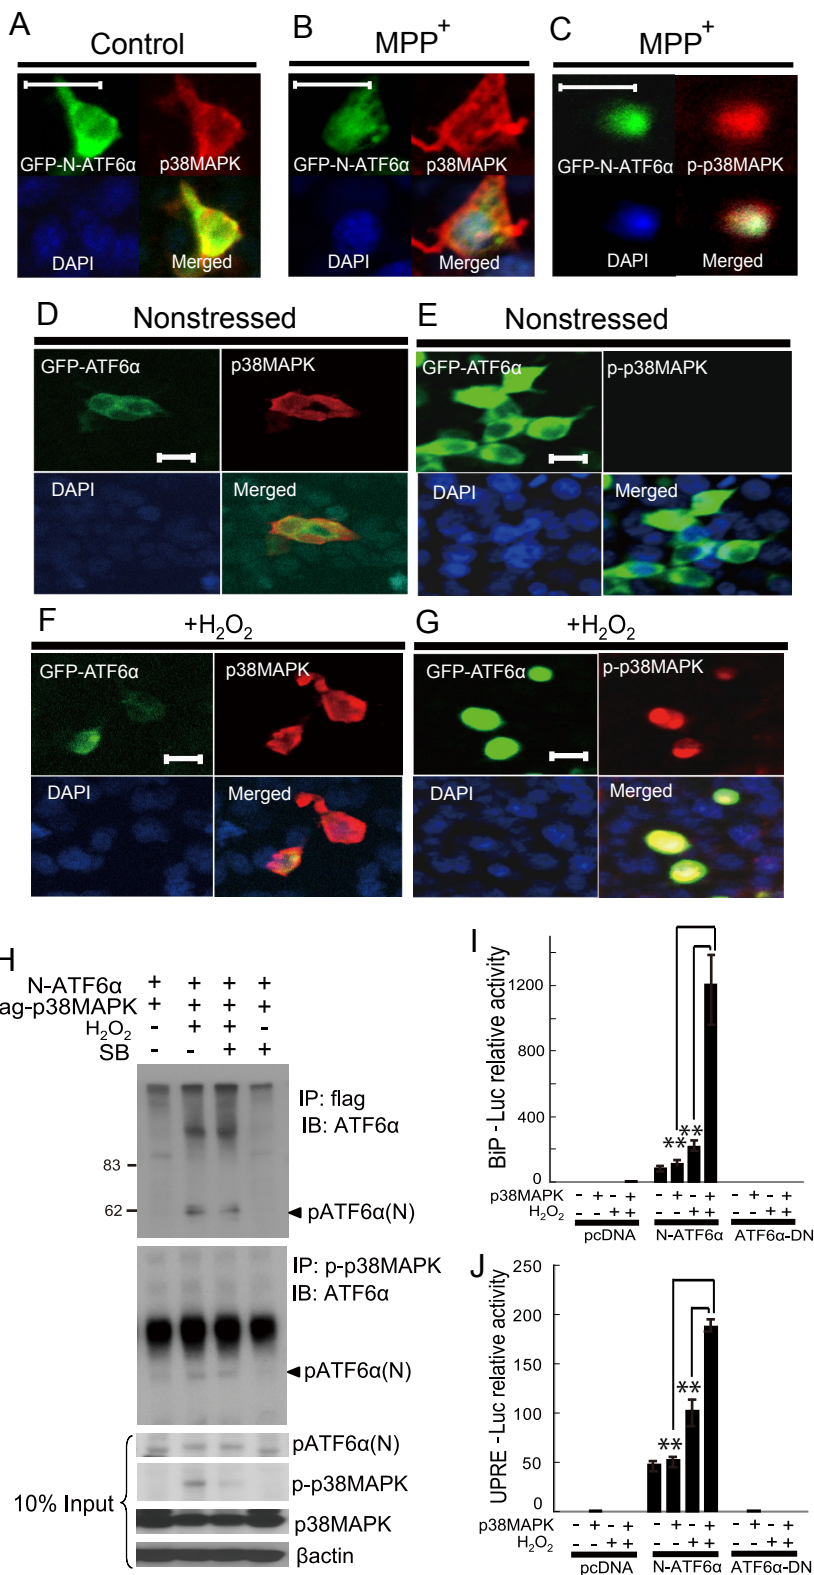

# Supplemental Table 1

## The List of the Primers and the Sequences

| Primer for                             | Sequences                   |
|----------------------------------------|-----------------------------|
| BiP forward                            | 5'-ACTTGGAATGACCCTACGGTG-3' |
| BiP reverse                            | 5'-TGCTTGTCGCTGGGCATC-3'    |
| ATF6 $\alpha$ forward                  | 5'-TTATCAGCATAACAGCCTGCG-3' |
| ATF6 $\alpha$ reverse                  | 5'-CTTGGGACTTTGAGCCTCTG-3'  |
| GRP94 forward                          | 5'-CTGGGTCAAGCAGAAAGGAG-3'  |
| GRP94 reverse                          | 5'-TGCCAGACCATCCATACTGA-3'  |
| p58 <sup>IPK</sup> forward             | 5'-GAAGCATCTTGAATTGGGGA-3'  |
| p58 <sup>IPK</sup> reverse             | 5'-CAAGCTTCCCTTGTTTGAGC-3'  |
| Derlin-3 forward                       | 5'-ATGCTGGAGGAGGGTTCTTT-3'  |
| Derlin-3 reverse                       | 5'-AGTGCTGTCAGAGTGGGCTT-3'  |
| GAPDH forward                          | 5'-CCCCACTAACATCAAATGGG-3'  |
| GAPDH reverse                          | 5'-CCATCCACAGTCTTCTGGGT-3'  |
| endogenous human BiP promoter forward  | 5'-AGTGACGTTTATTGCGGAGG-3'  |
| endogenous human BiP promoter reverse  | 5'-TTATATACCCTCCCCCAGCC-3'  |
| endogenous human GAPDH forward         | 5'-CTTCGTATGACTGGGGGTGT-3'  |
| endogenous human GAPDH reverse         | 5'-TTGAGGTCAATGAAGGGGTC-3'  |
| endogenous human Ngn2 promoter forward | 5'-CAGGACTGACAGGAGGAGGA-3'  |
| endogenous human Ngn2 promoter reverse | 5'-GTCTCGTGTGTTGTGGTGGT-3'  |
